# Supplementary material
Source: MDPI journal article supplement (https://www.mdpi.com/2673-7140/3/2/35)
Supplement: s1 [file s1]

**Supplementary Table S1. The effect of S:V on multiple enzymatic markers of *D. magna*.**  
Data represents average  $\pm$ SD (N=4) replicates for each control condition in units/mg BSA.

| Enzyme | Falcon            |                   |                    | Petri             |                  |                   |
|--------|-------------------|-------------------|--------------------|-------------------|------------------|-------------------|
|        | Control           | 0.5 $\mu$ l/L     | 1 $\mu$ l/L        | Control           | 0.5 $\mu$ l/L    | 1 $\mu$ l/L       |
| BGAL   | 6.01 $\pm$ 0.23   | 6.54 $\pm$ 0.17   | 6.74 $\pm$ 0.2     | 6.34 $\pm$ 0.1    | 7.07 $\pm$ 0.13  | 6.12 $\pm$ 0.24   |
| LIP    | 346.6 $\pm$ 12.08 | 356.4 $\pm$ 16.92 | 328.24 $\pm$ 11.91 | 308.18 $\pm$ 5.49 | 301 $\pm$ 15.32  | 295.33 $\pm$ 8.69 |
| GST    | 0.21 $\pm$ 0.01   | 0.21 $\pm$ 0.01   | 0.2 $\pm$ 0.01     | 0.21 $\pm$ 0.01   | 0.21 $\pm$ 0.01  | 0.23 $\pm$ 0.02   |
| LDH    | 3.58 $\pm$ 0.29   | 3.29 $\pm$ 0.13   | 4.28 $\pm$ 0.31    | 3.22 $\pm$ 0.16   | 5.23 $\pm$ 1.21  | 5.02 $\pm$ 0.61   |
| PEP    | 12.81 $\pm$ 0.34  | 13.09 $\pm$ 0.16  | 13.44 $\pm$ 0.18   | 12.62 $\pm$ 0.26  | 12.69 $\pm$ 0.27 | 11.2 $\pm$ 0.49   |
| ACP    | 4.86 $\pm$ 0.59   | 5.69 $\pm$ 0.73   | 6.28 $\pm$ 0.35    | 3.87 $\pm$ 0.35   | 3.62 $\pm$ 0.34  | 2.57 $\pm$ 0.31   |
| ALP    | 3.24 $\pm$ 0.35   | 3.49 $\pm$ 0.2    | 4.59 $\pm$ 0.15    | 4.13 $\pm$ 0.32\$ | 3.6 $\pm$ 0.61   | 3.28 $\pm$ 0.29   |
| TL     | 48.25 $\pm$ 5.04  | 45.37 $\pm$ 2.55  | 38.05 $\pm$ 5.76   | 40.86 $\pm$ 4.2   | 43.19 $\pm$ 4.56 | 34.01 $\pm$ 3.26  |
